# Supplementary material for: Nano-Pulse Treatment Overcomes Immunosuppressive Tumor Microenvironment to Elicit In Situ Vaccination Protection against Breast Cancer
Source: Preprints.org preprint supplement (doi:10.20944/preprints202405.0092.v1), 2024-05-02
Supplement: Supplementary file 1 [file supplementary]

***Supplementary Material***

**Nano pulse treatment overcomes immunosuppressive tumor microenvironment to elicit in situ vaccination protection against breast cancer**

Anthony Nanajian1,2, Megan Scott1, Niculina I. Burcus1, Brittney L. Ruedlinger1, Edwin A. Oshin1,3, Chunqi Jiang1,3, Stephen J. Beebe1 and Siqi Guo1*

1 Frank Reidy Research Center for Bioelectrics, Old Dominion University. Norfolk, VA, USA

2 Department of Biological Sciences, Old Dominion University. Norfolk, VA, USA

3 Department of Electrical & Computer Engineering, Old Dominion University, Norfolk, Virginia, USA,

*Correspondence to:

Siqi Guo, Phone: 757-683-7021. Fax: 757-451-1010. Email: s2guo@odu.edu


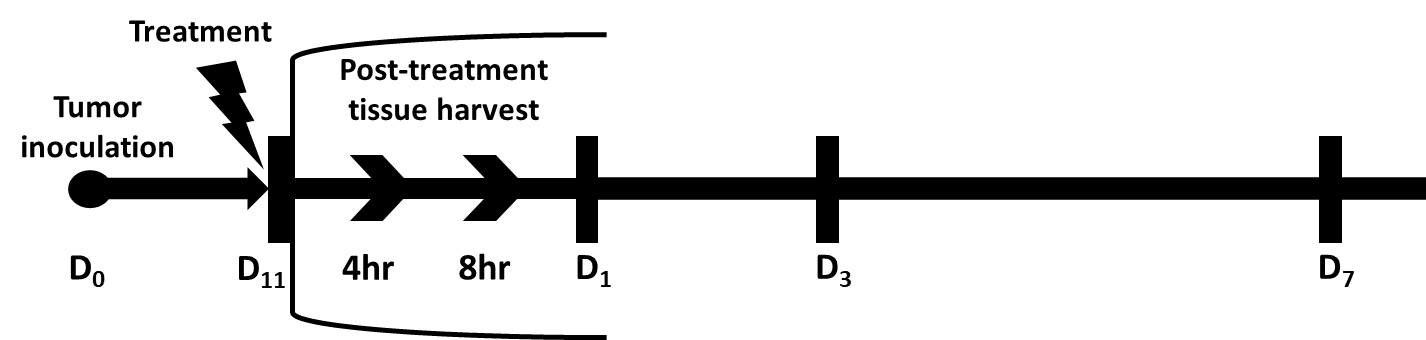


**Supplementary Figure 1.**

In vivo NPT experimental design. 1x106 4T1-luc cells were injected subcutaneously into the posterior part of the mammary fat pad. The control group (n=4) received the tumor inoculation only. The remaining mice underwent NPT (100 ns pulses, 50 kV/cm, 1-3 Hz, 1000 pulses) on Day 11 following tumor inoculation. The treated mice were euthanized 4 hours (4hr), 8 hours (8hr) (for local tissues only), and on Day 1 (D1), Day 3 (D3), and Day 7 (D7) post-NPT. Their tumor tissues, tumor-draining lymph nodes (dLN), blood and spleens were harvested. Control tissues were obtained from mice with untreated tumors. Single cell suspensions from each tissue were prepared.

**
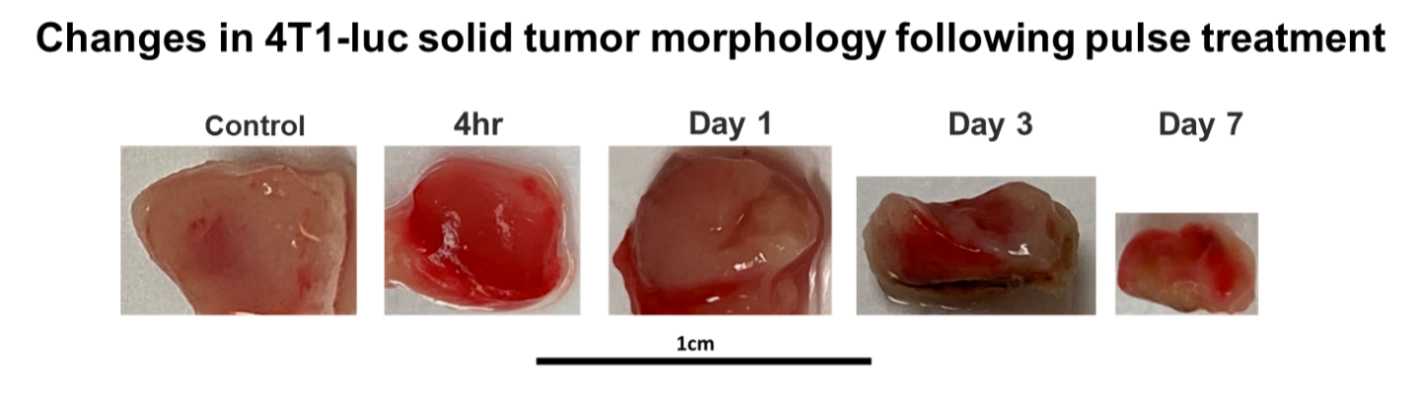
**

**Supplementary Figure 2.**

Resected 4t1-luc solid tumor samples can be seen rapidly deteriorating in size and morphology following NPT.


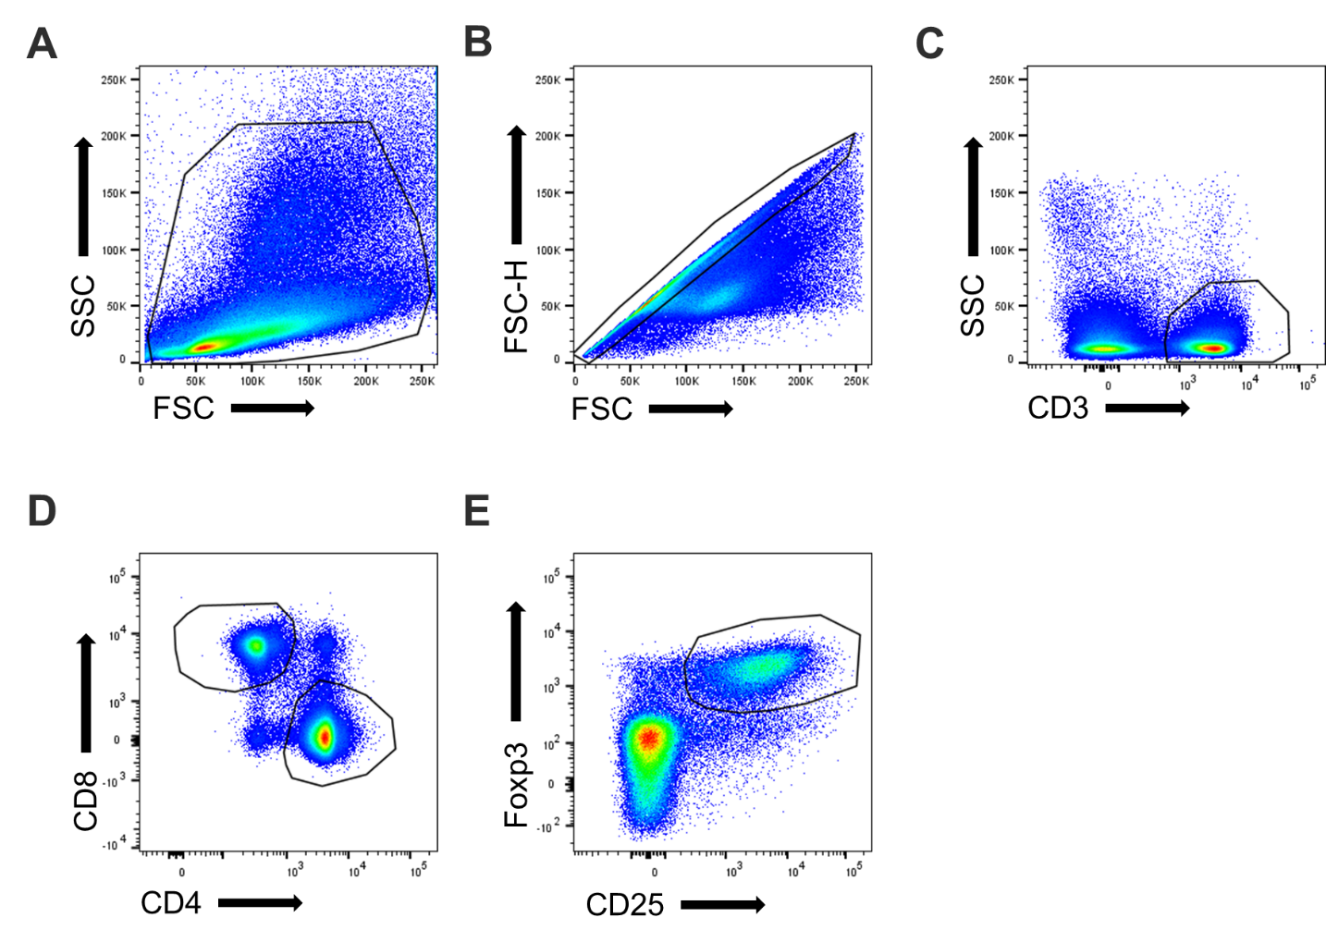


**Supplementary Figure 3.**

CD25+Foxp3+ Treg gating strategy. **A-E**, Summary flow plots representing the Treg gating strategy. **A**, Single cell suspensions from the dLN of 4t1-luc tumor-bearing mice were gated on the forward scatter (FSC) vs side scatter (SSC) dot plot to select lymphocytes. **B**, Lymphocytes were then gated on the FSC-Height vs FSC axis to eliminate doublets. **C** and **D**, CD3 cells were selected (**C**) and gated on the CD4 vs CD8 axis to separate CD4-single positive and CD8-single positive T cells (**D**). **E**, CD4-single positive T cells were then gated on the CD25 vs Foxp3 axis to select CD25+Foxp3+ Tregs.

**A**

**B**

**Supplementary Figure 4.**

NPT severely reduces intratumoral Tregs making their activation marker expression unquantifiable post-treatment. **A** and **B**, Flow plots representing Foxp3 co-expression with 4-1BB (**A**) and TGFβ (**B**) among CD4+ TILS in untreated tumors and on Day 3 and Day 7 post-NPT. N=4 per group.

**Supplementary Figure 5.**

NPT-induced changes in 4-1BB and Foxp3 co-expression among CD4+ T cells in the dLN. Flow plots represent 4-1BB and Foxp3 analysis among CD4+ T cells in the dLN of untreated tumor-bearing mice (Untreated control), tumor-naïve mice (Negative control) and treated mice from the 4-hour and Day 1 post-NPT timepoints. N=4 per group.

**Supplementary Figure 6.**

Comparing phenotypic characteristics among different Treg subsets in the untreated tumor dLN. **A,** Flow plots represent CD44/CD62L expression among the total Treg population (red) and 4-1BB+ subgate (blue) in the dLN of untreated tumor-bearing mice. **B,** TGFβ expression among naïve vs activated Tregs (left) and 4-1BB+ vs 4-1BB- Tregs (right).


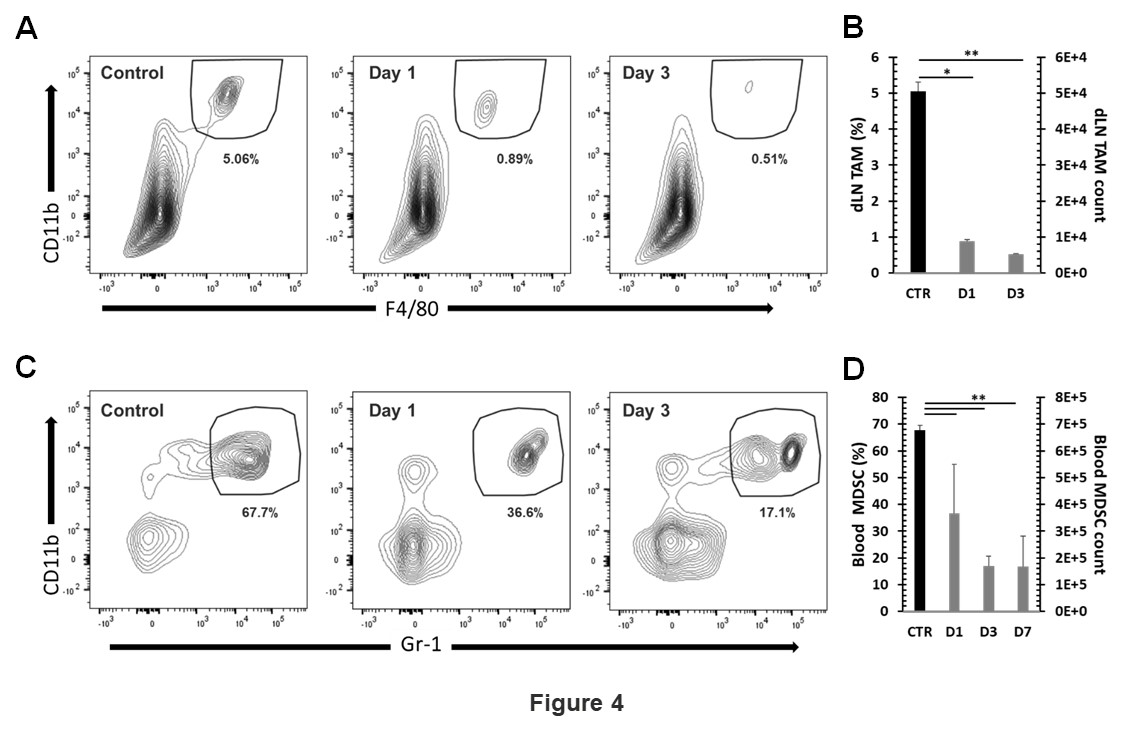


**Supplementary Figure 7.**

MDSCs and TAMs are decreased following NPT. F4/80+ CD11b+ TAMs in the dLN (**A** and **B**) and Gr-1+ CD11b+ MDSCs in the blood (**C** and **D**) are represented as a percentage among total single events in the summary flow plots (**A** and **C**) and quantitative bar graphs (**B** and **D**). A standardized cell count is represented for TAMs (**B**) and MDSCs (**C**). N=4 per group. Error bars, SD. ** p < 0.01 and * p < 0.05 determined by one-way ANOVA.
